# Supplementary material for: Integrated In Vivo Quantitative Proteomics and Nutrient Tracing Reveals Age-Related Metabolic Rewiring of Pancreatic β Cell Function
Source: PubMed Central journal article supplement — Cell Rep. Author manuscript; Available in PMC 2019 Jan 3. (PMC6317899; doi:10.1016/j.celrep.2018.11.031), 2018-12-04
Supplement: NIHMS1516766-supplement-1.pdf [file NIHMS1516766-supplement-1.pdf]

**Supplemental Information**

**Integrated *In Vivo* Quantitative Proteomics  
and Nutrient Tracing Reveals Age-Related  
Metabolic Rewiring of Pancreatic  $\beta$  Cell Function**

**Matthew Wortham, Jacqueline R. Benthuisen, Martina Wallace, Jeffrey N. Savas, Francesca Mulas, Ajit S. Divakaruni, Fenfen Liu, Verena Albert, Brandon L. Taylor, Yinghui Sui, Enrique Saez, Anne N. Murphy, John R. Yates III, Christian M. Metallo, and Maike Sander**

SUPPLEMENTAL FIGURES

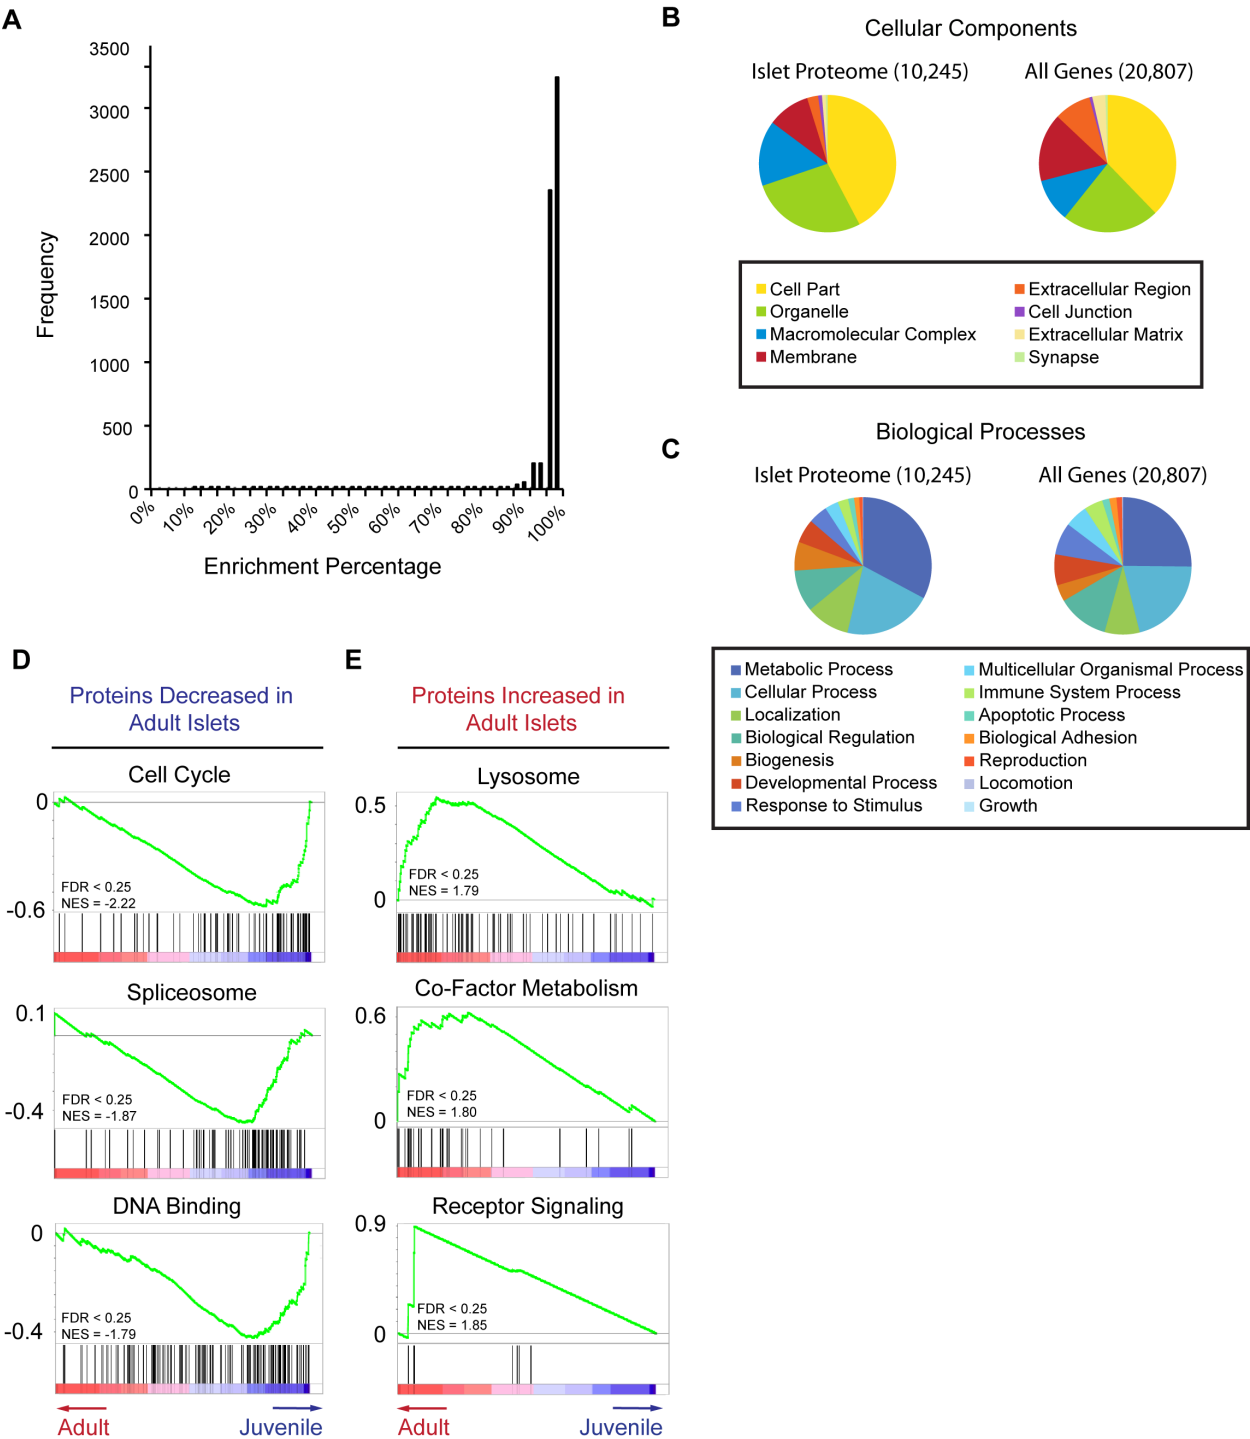

**Figure S1 – Related to Figure 1. SILAM Mud-PIT MS captures a diverse set of islet proteins.**

(A) Labeling efficiency of islet proteins shown as the number of peptides with the indicated percent incorporation of  $^{15}\text{N}$ .

(B and C) Gene Ontology analysis of the entire quantified islet proteome as compared to all genes shows the distribution of proteins categorized by cellular component and biological process.

(D and E) Gene Set Enrichment Analysis of islet proteins differentially regulated in islets from 4-week-old and 1-year-old mice.

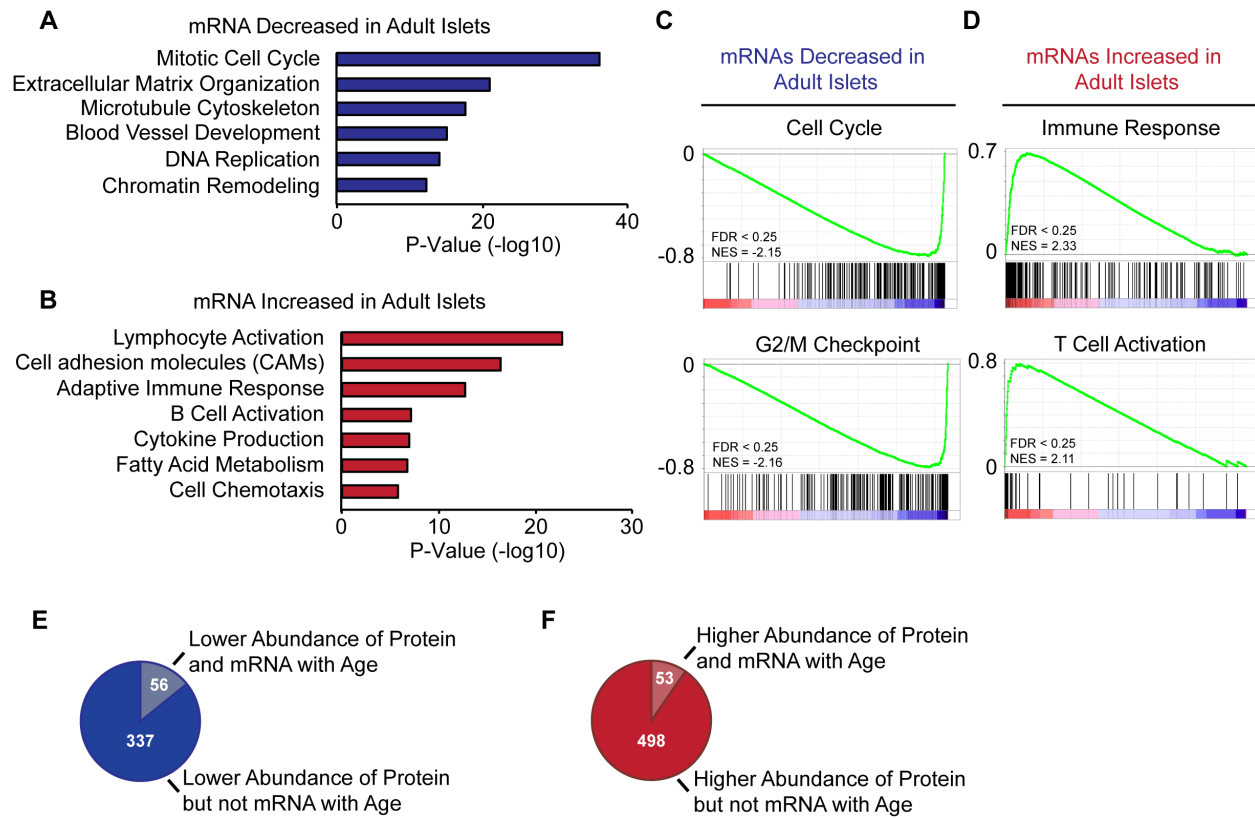

**Figure S2 – Related to Figure 2. RNA-sequencing reveals mRNAs regulated in islets with age.**

(A) Gene ontology (GO) analysis of islet mRNAs decreased in 1-year-old compared to 4-week-old mice (n=3 per group).

(B) GO analysis of islet mRNAs increased in 1-year-old compared to 4-week-old mice.

(C) Gene Set Enrichment Analysis (GSEA) of islet mRNAs decreased with age.

(D) GSEA of islet mRNAs increased with age.

(E and F) Pie graphs representing the number of uniquely named proteins found differentially expressed in adult and juvenile islets with and without coordinate mRNA regulation.

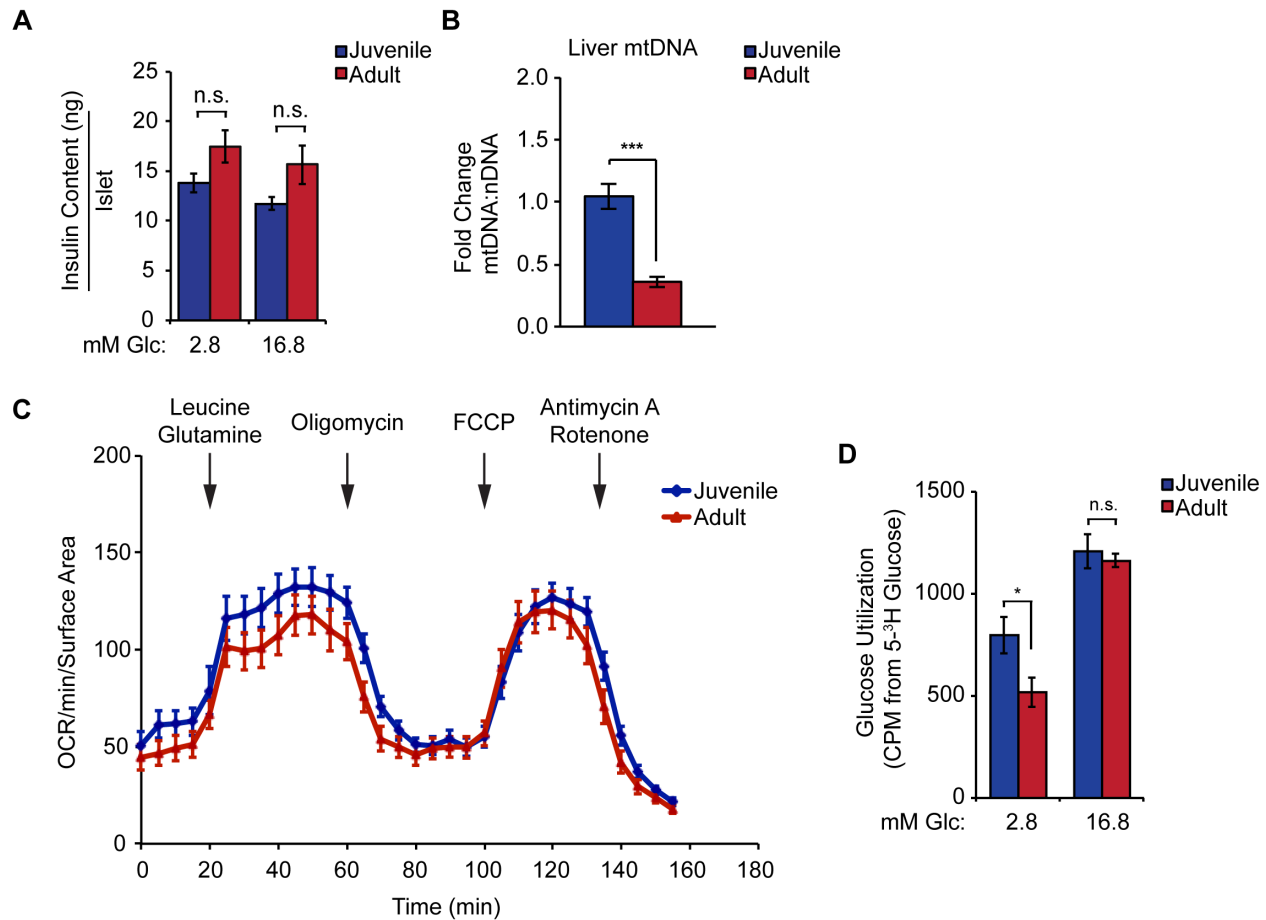

**Figure S3 – Related to Figure 3. Age-associated changes in islet insulin content, liver mitochondrial DNA content and islet function.**

(A) Insulin content of juvenile and adult islets following a one-hour incubation in the indicated glucose concentrations (n=7-9 replicates per group, calculated from 10 islets per replicate).

(B) Mitochondrial DNA (mtDNA) compared to nuclear DNA (nDNA) in liver from juvenile and adult mice (n=3 mice per group).

(C) Oxygen consumption rates (OCR) of islets from juvenile and adult mice treated with 10 mM Leucine and 10 mM Glutamine, 5  $\mu$ M Oligomycin, 2  $\mu$ M FCCP, 0.5  $\mu$ M Rotenone and 2  $\mu$ M Antimycin A (n=7-10 per group).

(D) Glucose utilization rates of juvenile and adult islets as determined by release of <sup>3</sup>H<sub>2</sub>O from islets incubated with 5-<sup>3</sup>H glucose. Islets were incubated with the indicated concentrations of unlabeled glucose (Glc) spiked with 5-<sup>3</sup>H glucose (n=5-6 per group).

Glc, glucose; error bars represent  $\pm$  S.E.M.; \*p < 0.05, \*\*\*p < 0.001 by unpaired two tailed t-test.

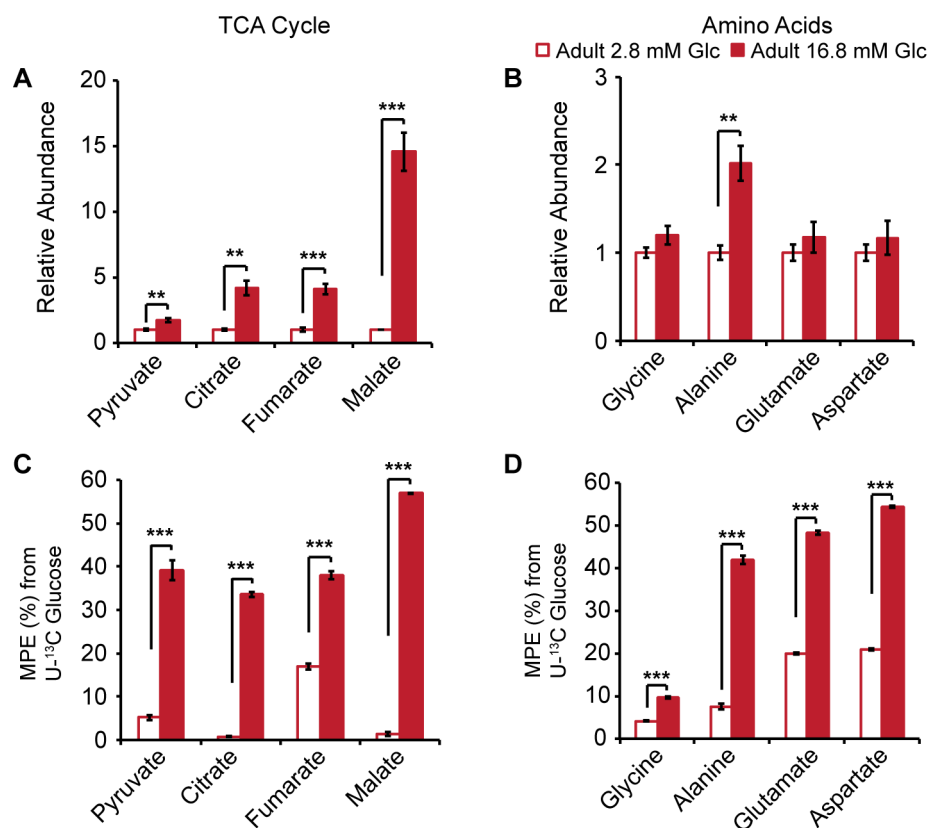

**Figure S4 – Related to Figure 4. U-<sup>13</sup>C glucose tracing and targeted metabolomics in islets from adult mice.**

(**A** and **B**) Abundances of the indicated metabolites following a one-hour trace with 2.8 mM or 16.8 mM U-<sup>13</sup>C glucose in adult islets, expressed relative to metabolite levels of islets incubated in 2.8 mM U-<sup>13</sup>C glucose.

(**C** and **D**) Molar percent enrichment (MPE) of <sup>13</sup>C for the indicated metabolites.

Glc, glucose; n=4-6 per group; error bars represent ± S.E.M.; \*\*p < 0.01, \*\*\*p < 0.001 by unpaired two tailed t-test.

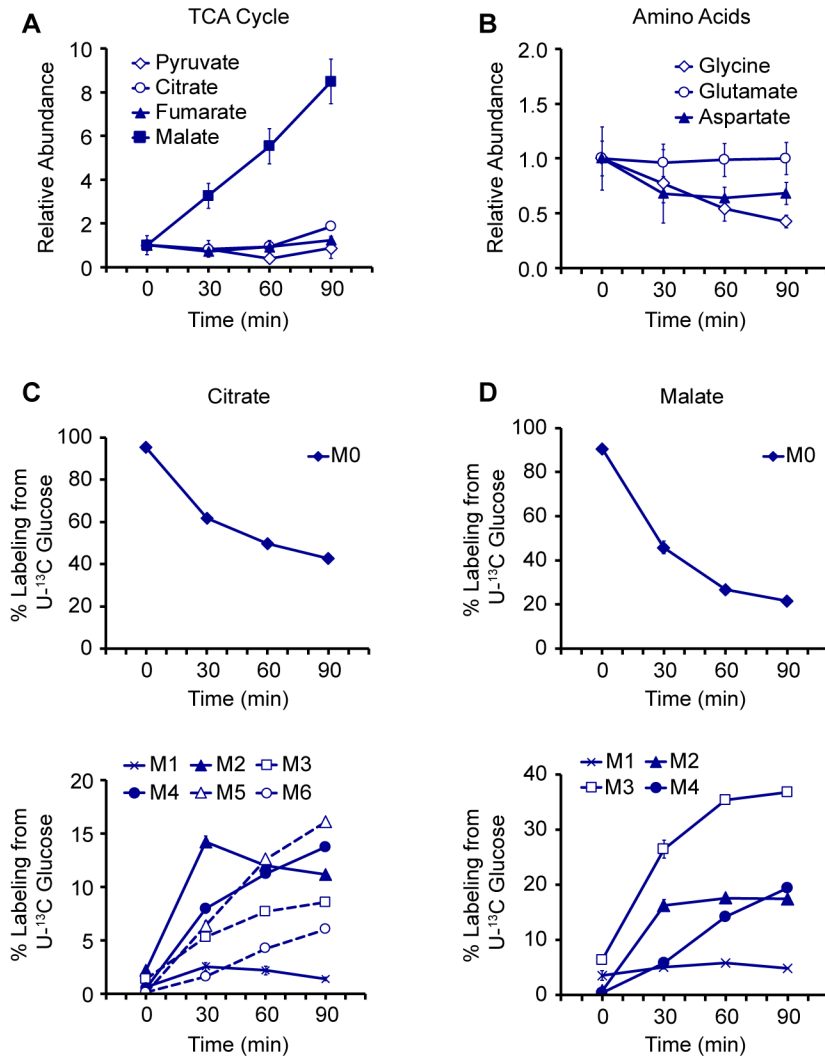

**Figure S5 – Related to Figure 5. Isotopologue distributions and metabolite abundances over a time course of U-<sup>13</sup>C glucose tracing.**

**(A and B)** Abundances of the indicated metabolites over a time course of 16.8 mM U-<sup>13</sup>C glucose tracing in islets from 4-week-old mice, expressed relative to metabolite levels at 0 minutes.

**(C and D)** Isotopologue distributions of <sup>13</sup>C for citrate (C) and malate (D) over a time course of 16.8 mM U-<sup>13</sup>C glucose tracing in islets from 4-week-old mice. Isotopologue distributions are expressed as % of the total metabolite pool containing the indicated number of labeled atoms.

n=6-7 per group; error bars represent S.E.M.

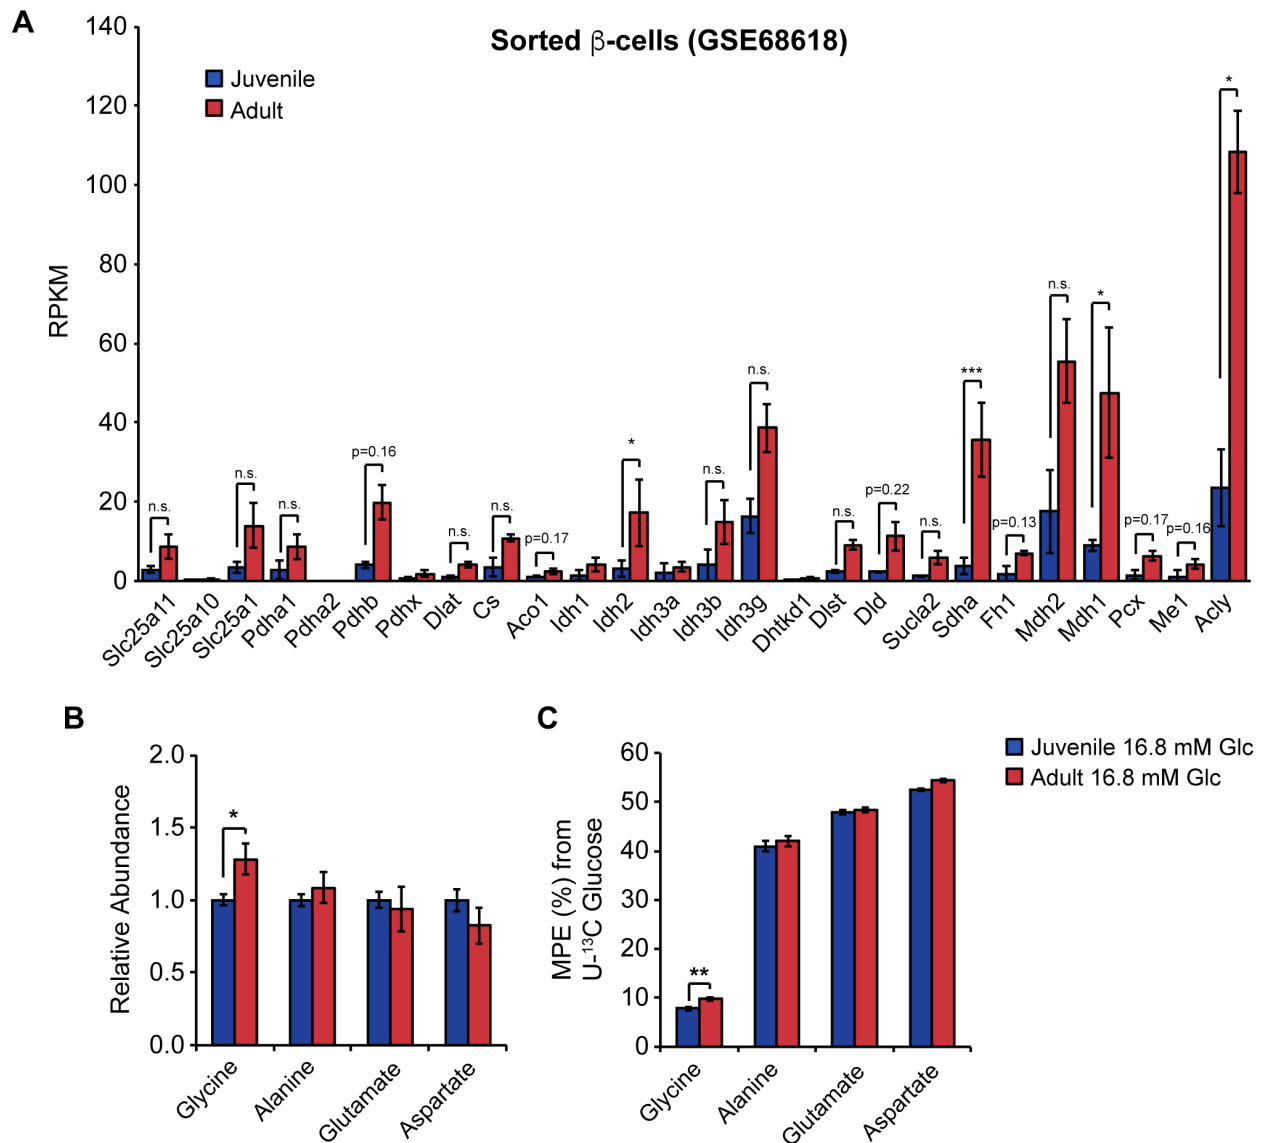

**Figure S6 – Related to Figure 6.  $U-^{13}C$  glucose tracing and targeted metabolomics of amino acids during glucose stimulation in juvenile and adult islets.**

(A) RPKM values for mRNAs encoding the indicated enzymes and transporters in FACS-sorted  $\beta$ -cells from juvenile and adult mice ( $n=2-3$  per group). Data from Avrahami et al., 2015. Error bars represent  $\pm$  S.E.M.; \* $p < 0.05$ , \*\*\* $p < 0.001$  by Cuffdiff.

(B) Abundances of the indicated amino acids following a one-hour trace with 16.8 mM  $U-^{13}C$  glucose in juvenile and adult islets, expressed relative to metabolite levels of juvenile islets.

(C) Molar percent enrichment (MPE) of  $^{13}C$  for the indicated amino acids.

Glc, glucose;  $n=4-6$  per group in B-D; error bars represent  $\pm$  S.E.M.; \* $p < 0.05$ , \*\* $p < 0.01$ , by unpaired two tailed t-test (B-C).
